# Supplementary material for: PSYCHE—A Valuable Experiment in Plant NMR-Metabolomics
Source: PubMed Central journal article supplement (PMC7662903; doi:10.3390/molecules25215125), 2020-11-04
Supplement: molecules-25-05125-s001.pdf [file molecules-25-05125-s001.pdf]

# Supplement: PSYCHE - a valuable experiment in plant NMR-metabolomics

Pauline Stark <sup>1,\*</sup>, Caroline Zab <sup>1</sup>, Andrea Porzel <sup>1</sup>, Katrin Franke <sup>1</sup>, Paride Rizzo <sup>2</sup> and Ludger A. Wessjohann<sup>1,\*</sup>

<sup>1</sup> Department of Bioorganic Chemistry, Leibniz Institute of Plant Biochemistry, Weinberg 3, 06120 Halle/Saale, Germany

<sup>2</sup> Department of Bioorganic Chemistry, Leibniz Institute of Plant Genetics and Crop Plant Research, Corrensstraße 3, 06466 Seeland, Germany

\* Correspondence: Ludger.Wessjohann@ipb-halle.de; Tel.: + 49 (0) 345 5582 1300  
Pauline.Stark@ipb-halle.de

## Content

|                                                                                                       |   |
|-------------------------------------------------------------------------------------------------------|---|
| Figure S.1: Chemical structures and corresponding <sup>1</sup> H-NMR data.....                        | 2 |
| Table S.1: List of plant material .....                                                               | 3 |
| Figure S.2: Graphical representation of different bin sizes for selected quantified signals.....      | 4 |
| Table S.2: Quantitative correlation of bins of different signals .....                                | 5 |
| Figure S.3: Boxplots of correlation coefficients for different experiments with varied bin sizes..... | 6 |
| Figure S.4: Stacked conventional <sup>1</sup> H-NMR spectra of <i>Hypericum</i> species.....          | 7 |
| Figure S.5: Stacked PSYCHE spectra of <i>Hypericum</i> species.....                                   | 8 |
| Figure S.6: PCA scores plots of selected experiments .....                                            | 9 |

**Figure S.1: Chemical structures and corresponding  $^1\text{H-NMR}$  data**

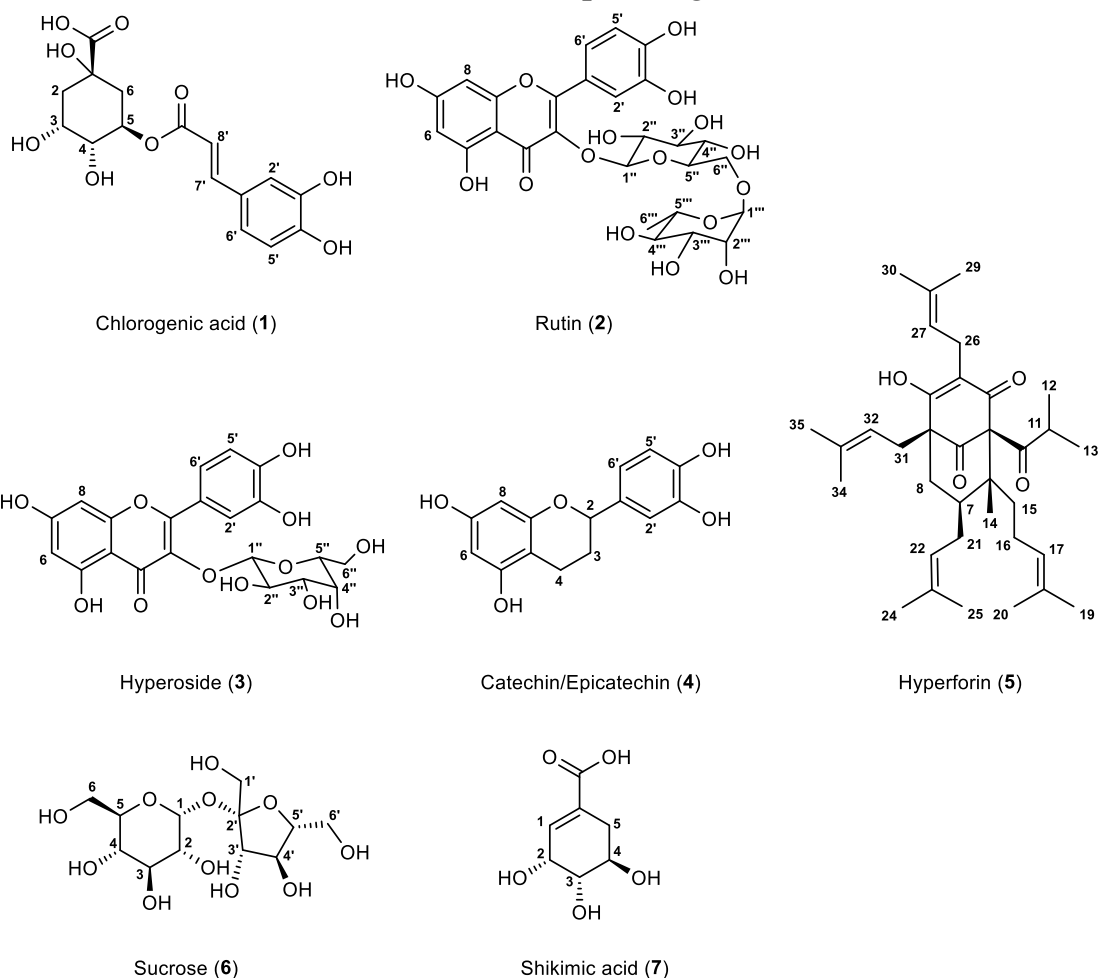

**Chlorogenic acid (1):**  $^1\text{H NMR}$  (600 MHz, Methanol- $d_4$ )  $\delta$  7.55 (d,  $J = 15.9$  Hz, 1H, H-7'), 7.04 (d,  $J = 2.1$  Hz, 1H, H-2'), 6.95 (dd,  $J = 8.2, 2.1$  Hz, 1H, H-6'), 6.77 (d,  $J = 8.2$  Hz, 1H, H-5'), 6.26 (d,  $J = 15.9$  Hz, 1H, H-8'), 5.33 (m, 1H, H-3), 4.16 (m, 1H, H-5), 3.72 (m, 1H, H-4), 2.19 (m, 2H, H-6), 2.05 (m, 2H, H-2).

**Rutin (2):**  $^1\text{H NMR}$  (600 MHz, Methanol- $d_4$ )  $\delta$  7.66 (d,  $J = 2.2$  Hz, 1H, H-2'), 7.63 (dd,  $J = 8.4, 2.2$  Hz, 1H, H-6'), 6.87 (d,  $J = 8.4$  Hz, 1H, H-5'), 6.40 (d,  $J = 2.1$  Hz, 1H, H-8), 6.21 (d,  $J = 2.1$  Hz, 1H, H-6), 5.11 (d,  $J = 7.7$  Hz, 2H, H-1''), 4.52 (d,  $J = 1.6$  Hz, 1H, H-1''), 3.83 – 3.21 (H-2''-H-6'', H-2''''-H-5'''), 1.12 (d,  $J = 6.2$  Hz, 3H, H-6''').

**Hyperoside (3):**  $^1\text{H NMR}$  (600 MHz, Methanol- $d_4$ )  $\delta$  7.84 (d,  $J = 2.2$  Hz, 1H, H-6'), 7.58 (dd, 1H, H-2'), 6.87 (d, 1H, H-5'), 6.41 (d,  $J = 2.2$  Hz, 1H, H-8), 6.21 (d,  $J = 2.2$  Hz, 1H, H-6), 5.17 (dd,  $J = 7.2, 2.5$  Hz, 2H, H-1''), 3.93 – 3.37 (m, 5H, H-2''-H-6'').

**Epicatechin (4):**  $^1\text{H NMR}$  (600 MHz, Methanol- $d_4$ )  $\delta$  6.97 (d,  $J = 1.9$  Hz, 1H, H-2'), 6.79 (dd,  $J = 8.2, 2.0$  Hz, 1H, H-5'), 6.75 (d,  $J = 8.2$  Hz, 1H, H-6'), 5.93 (d,  $J = 2.4$  Hz, 1H, H-6), 5.91 (d,  $J = 2.3$  Hz, 1H, H-8), 4.58 (s, 1H, H-2), 4.17 (m, 1H, H-3), 2.86 (dd,  $J = 16.7, 4.6$  Hz, 1H, H-4a), 2.73 (dd,  $J = 16.7, 3.0$  Hz, 1H, H-4b).

**Hyperforin (5):**  $^1\text{H NMR}$  (600 MHz, Methanol- $d_4$ )  $\delta$  5.21 (t, 1H, H-27), 5.10 (t, 2H, H-17), 5.06 (t, 1H, H-22), 5.01 (t, 1H, H-32), 3.18 (m, 1H, H-26a), 3.03 (m, 1H, H-26b), 2.42 (dd,  $J = 14.6, 7.8$  Hz, 1H, H-31a), 2.32 (dd,  $J = 14.3, 7.7$  Hz, 1H, H-31b), 1.70 – 1.54 (m, 24H, H-19, H-20, H-24, H-25, H-29, H-30, H-34, H-35), 1.45 – 1.16 (m, 10H, H-7, H-8, H-11, H-15, H-16, H-21), 1.05 (d,  $J = 6.6$  Hz, 3H, H-12), 1.07 (d,  $J = 6.6$  Hz, 3H, H-13), 0.93 (s, 3H, H-14).

**Sucrose (6):**  $^1\text{H NMR}$  (600 MHz, Methanol- $d_4$ )  $\delta$  5.38 (d,  $J = 3.8$  Hz, 1H, H-4a), 4.09 (m, 1H, H-2'), 3.63 (d,  $J = 12.3$  Hz, 1H, H-8), 3.59 (d,  $J = 12.3$  Hz, 1H, H-6), 3.41 (dd,  $J = 9.8, 3.8$  Hz, 2H, H-4b).

**Shikimic acid (7):**  $^1\text{H NMR}$  (600 MHz, Methanol- $d_4$ )  $\delta$  6.79 (m, 1H, H-2), 4.37 (m, 1H, H-3), 3.98 (m, 1H, H-4), 3.67 (m, 1H, H-5), 2.69 (m, 1H, H-6a), 2.19 (m, 1H, H-6b).

**Table S.1: List of plant material**Specification of *Hypericum* plant material used and naming scheme

| <b>Genotype</b> | <b>Species</b>                         | <b>Section</b>       | <b>biological replicates</b> |
|-----------------|----------------------------------------|----------------------|------------------------------|
| IPK_2           | <i>H. attenuatum</i> Fisch. ex Choisy  | <i>Hypericum</i>     | 3                            |
| IPK_3           | <i>H. grandifolium</i> Choisy          | <i>Androsaemum</i>   | 3                            |
| IPK_4           | <i>H. calycinum</i> L.                 | <i>Ascyreia</i>      | 3                            |
| IPK_5           | <i>H. inodorum</i> Mill.               | <i>Androsaemum</i>   | 3                            |
| IPK_10          | <i>H. polyphyllum</i> Boiss. & Balansa | <i>Olympia</i>       | 3                            |
| IPK_24          | <i>H. perforatum</i> L.                | <i>Hypericum</i>     | 1                            |
| IPK_27          | <i>H. androsaemum</i> L.               | <i>Androsaemum</i>   | 3                            |
| IPK_28          | <i>H. maculatum</i> Crantz             | <i>Hypericum</i>     | 3                            |
| IPK_33          | <i>H. coris</i> L.                     | <i>Coridium</i>      | 3                            |
| IPK_34          | <i>H. hirsutum</i> L.                  | <i>Taeniocarpium</i> | 3                            |
| IPK_35          | <i>H. orientale</i> L.                 | <i>Crossophyllum</i> | 3                            |
| KEW_02          | <i>H. hookerianum</i> L.               | <i>Ascyreia</i>      | 2                            |
| KEW_04          | <i>H. canariense</i> L.                | <i>Webbia</i>        | 3                            |
| KEW_05          | <i>H. reflexum</i> L.f.                | <i>Adenosepalum</i>  | 1                            |
| KEW_09          | <i>H. perforatum</i> L.                | <i>Hypericum</i>     | 3                            |
| KEW_10          | <i>H. perforatum</i> L.                | <i>Hypericum</i>     | 2                            |
| KEW_12          | <i>H. perforatum</i> L.                | <i>Hypericum</i>     | 3                            |
| KEW_15          | <i>H. tetrapterum</i> Fr.              | <i>Hypericum</i>     | 2                            |
| KEW_19          | <i>H. humifusum</i> L.                 | <i>Oligostema</i>    | 3                            |
| KEW_22          | <i>H. elodes</i> L.                    | <i>Elodes</i>        | 3                            |
| KEW_23          | <i>H. barbatum</i> Jacq.               | <i>Drosocarpium</i>  | 3                            |
| KEW_26          | <i>H. perforatum</i> L.                | <i>Hypericum</i>     | 3                            |
| KEW_27          | <i>H. pulchrum</i> L.                  | <i>Taeniocarpium</i> | 3                            |
| KEW_28          | <i>H. pulchrum</i> L.                  | <i>Taeniocarpium</i> | 3                            |
| KEW_33          | <i>H. curvisepalum</i> N. Robson       | <i>Ascyreia</i>      | 3                            |
| KEW_37          | <i>H. lagarocladum</i> N. Robson       | <i>Ascyreia</i>      | 3                            |
| KEW_44          | <i>H. androsaemum</i> L.               | <i>Androsaemum</i>   | 3                            |
| KEW_45          | <i>H. tetrapterum</i> Fr.              | <i>Hypericum</i>     | 2                            |
| KEW_46          | <i>H. coris</i> L.                     | <i>Coridium</i>      | 2                            |

**Figure S.2: Graphical representation of different bin sizes for selected quantified signals**

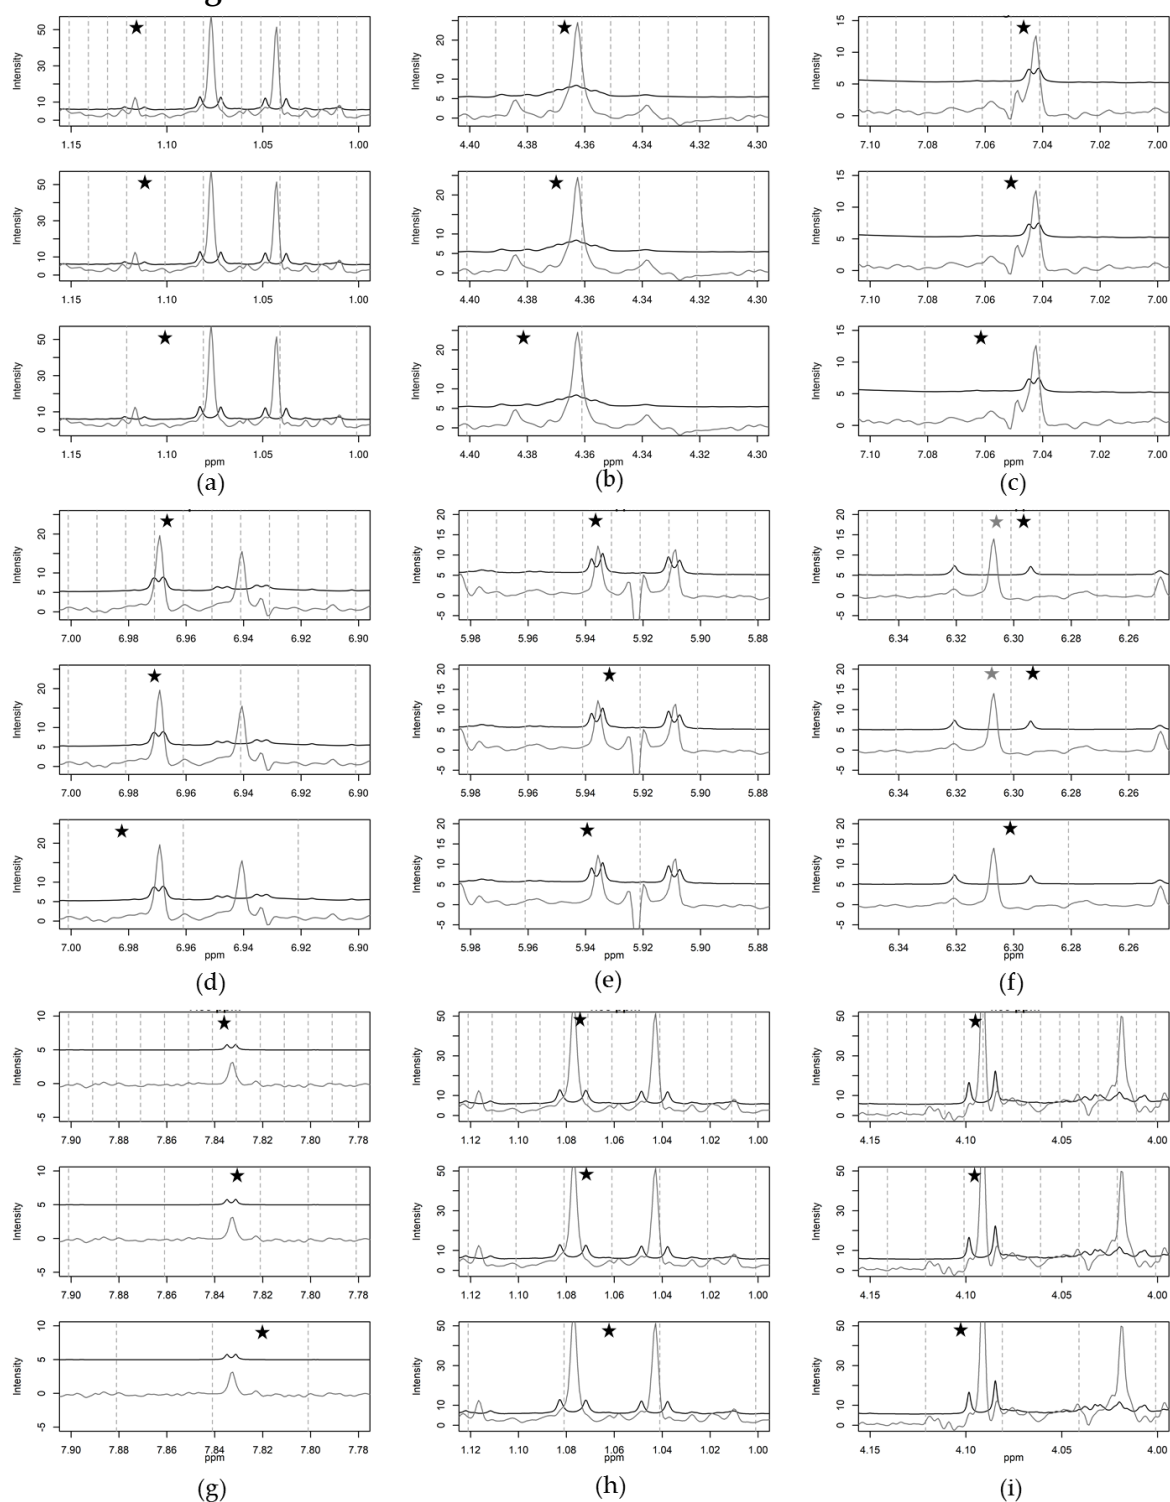

Figure 1. Selected sections of conventional  $^1\text{H-NMR}$  (black) and PSYCHE (grey) spectra of a representative *H. perforatum* sample to display signal at: (a) 1.12 ppm (d, 6.2 Hz) corresponding to rutin (**2**, H-6''); (b) 4.36 ppm (m) corresponding to shikimic acid (**7**, H-4); (c) 7.05 ppm (d, 2.1 Hz) corresponding to chlorogenic acid (H-2') (d) 6.97 ppm (d, 1.9 Hz) corresponding to epicatechin/catechin (H-2'); (e) 5.94 ppm (d, 2.4 Hz) corresponding to epicatechin/catechin (H-6); (f) 6.31 ppm (d, 15.8 Hz) corresponding to chlorogenic acid (H-8'); (g) 7.83 ppm (d, 2.2 Hz) corresponding to hyperoside (H-2'); (h) 1.08 ppm (d, 6.5 Hz) corresponding to hyperforin (H<sub>3</sub>-12); (i) 4.09 ppm (d, 8.2 Hz) corresponding to sucrose (H-3'). For each signal, three bin sizes are shown (from up to down: 0.01, 0.02, and 0.04 ppm). The dashed vertical grey lines mark the borders of each bin. The bin selected for the evaluation is marked with an asterisk.

**Table S.2: Quantitative correlation of bins of different signals**

Summary of the coefficient of determination ( $R^2$ ) of linear regression between integral ( $^1\text{H}$  qNMR) and bin values of experiments with different bin sizes.

| Compound                 | Assignment         | $\delta$ [ppm] multiplicity<br>(J [Hz]) | Bin size<br>[ppm] | R <sup>2</sup> of experiment |        |
|--------------------------|--------------------|-----------------------------------------|-------------------|------------------------------|--------|
|                          |                    |                                         |                   | $^1\text{H}_{\text{conv}}$   | PSYCHE |
| Chlorogenic acid (1)     | H-8'               | 6.31 d (15.8 Hz)                        | 0.01              | 0.7822                       | 0.7200 |
|                          |                    |                                         | 0.02              | 0.6553                       | 0.8485 |
|                          |                    |                                         | 0.04              | 0.8667                       | 0.801  |
| Chlorogenic acid (1)     | H-2'               | 7.05 d (2.1 Hz)                         | 0.01              | 0.7537                       | 0.5365 |
|                          |                    |                                         | 0.02              | 0.7865                       | 0.5748 |
|                          |                    |                                         | 0.04              | 0.744                        | 0.5861 |
| Rutin (2)                | H-6'''             | 1.12 d (6.2 Hz)                         | 0.01              | 0.8166                       | 0.6229 |
|                          |                    |                                         | 0.02              | 0.8176                       | 0.7331 |
|                          |                    |                                         | 0.04              | 0.8311                       | 0.3024 |
| Hyperoside (3)           | H-2'               | 7.83 d (2.2 Hz)                         | 0.01              | 0.902                        | 0.8884 |
|                          |                    |                                         | 0.02              | 0.9288                       | 0.881  |
|                          |                    |                                         | 0.04              | 0.9178                       | 0.8518 |
| Epicatechin/Catechin (4) | H-6                | 5.94 d (2.4 Hz)                         | 0.01              | 0.9925                       | 0.9156 |
|                          |                    |                                         | 0.02              | 0.9740                       | 0.7974 |
|                          |                    |                                         | 0.04              | 0.9824                       | 0.8204 |
| Epicatechin/Catechin (4) | H-2'               | 6.97 d (1.9 Hz)                         | 0.01              | 0.7791                       | 0.7526 |
|                          |                    |                                         | 0.02              | 0.8104                       | 0.7525 |
|                          |                    |                                         | 0.04              | 0.7896                       | 0.7627 |
| Hyperforin (5)           | H <sub>3</sub> -12 | 1.08 d (6.5 Hz)                         | 0.01              | 0.8753                       | 0.8635 |
|                          |                    |                                         | 0.02              | 0.8842                       | 0.8380 |
|                          |                    |                                         | 0.04              | 0.8237                       | 0.8305 |
| Sucrose (6)              | H-3'               | 4.09 d (8.2 Hz)                         | 0.01              | 0.9294                       | 0.5399 |
|                          |                    |                                         | 0.02              | 0.9945                       | 0.9080 |
|                          |                    |                                         | 0.04              | 0.8928                       | 0.8542 |
| Shikimic acid (7)        | H-4                | 4.36 m ( $\nu_{1/2}$ 4.7 Hz)            | 0.01              | 0.7929                       | 0.8025 |
|                          |                    |                                         | 0.02              | 0.8412                       | 0.8706 |
|                          |                    |                                         | 0.04              | 0.8115                       | 0.8762 |

**Figure S.3: Boxplots of correlation coefficients for different experiments with varied bin sizes**

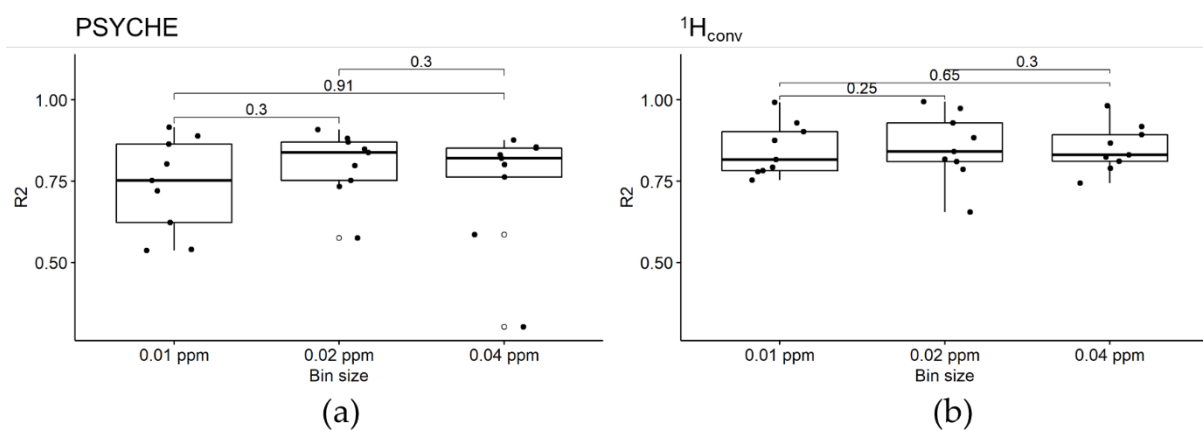

Boxplot of  $R^2$  with varied bin sizes of (a) PSYCHE and (b) conventional  $^1\text{H-NMR}$  ( $^1\text{H}_{\text{conv}}$ ). Significance Test: Wilcoxon-Mann-Whitney paired (shown is the p-value).

Figure S.4: Stacked conventional  $^1\text{H}$ -NMR spectra of *Hypericum* species

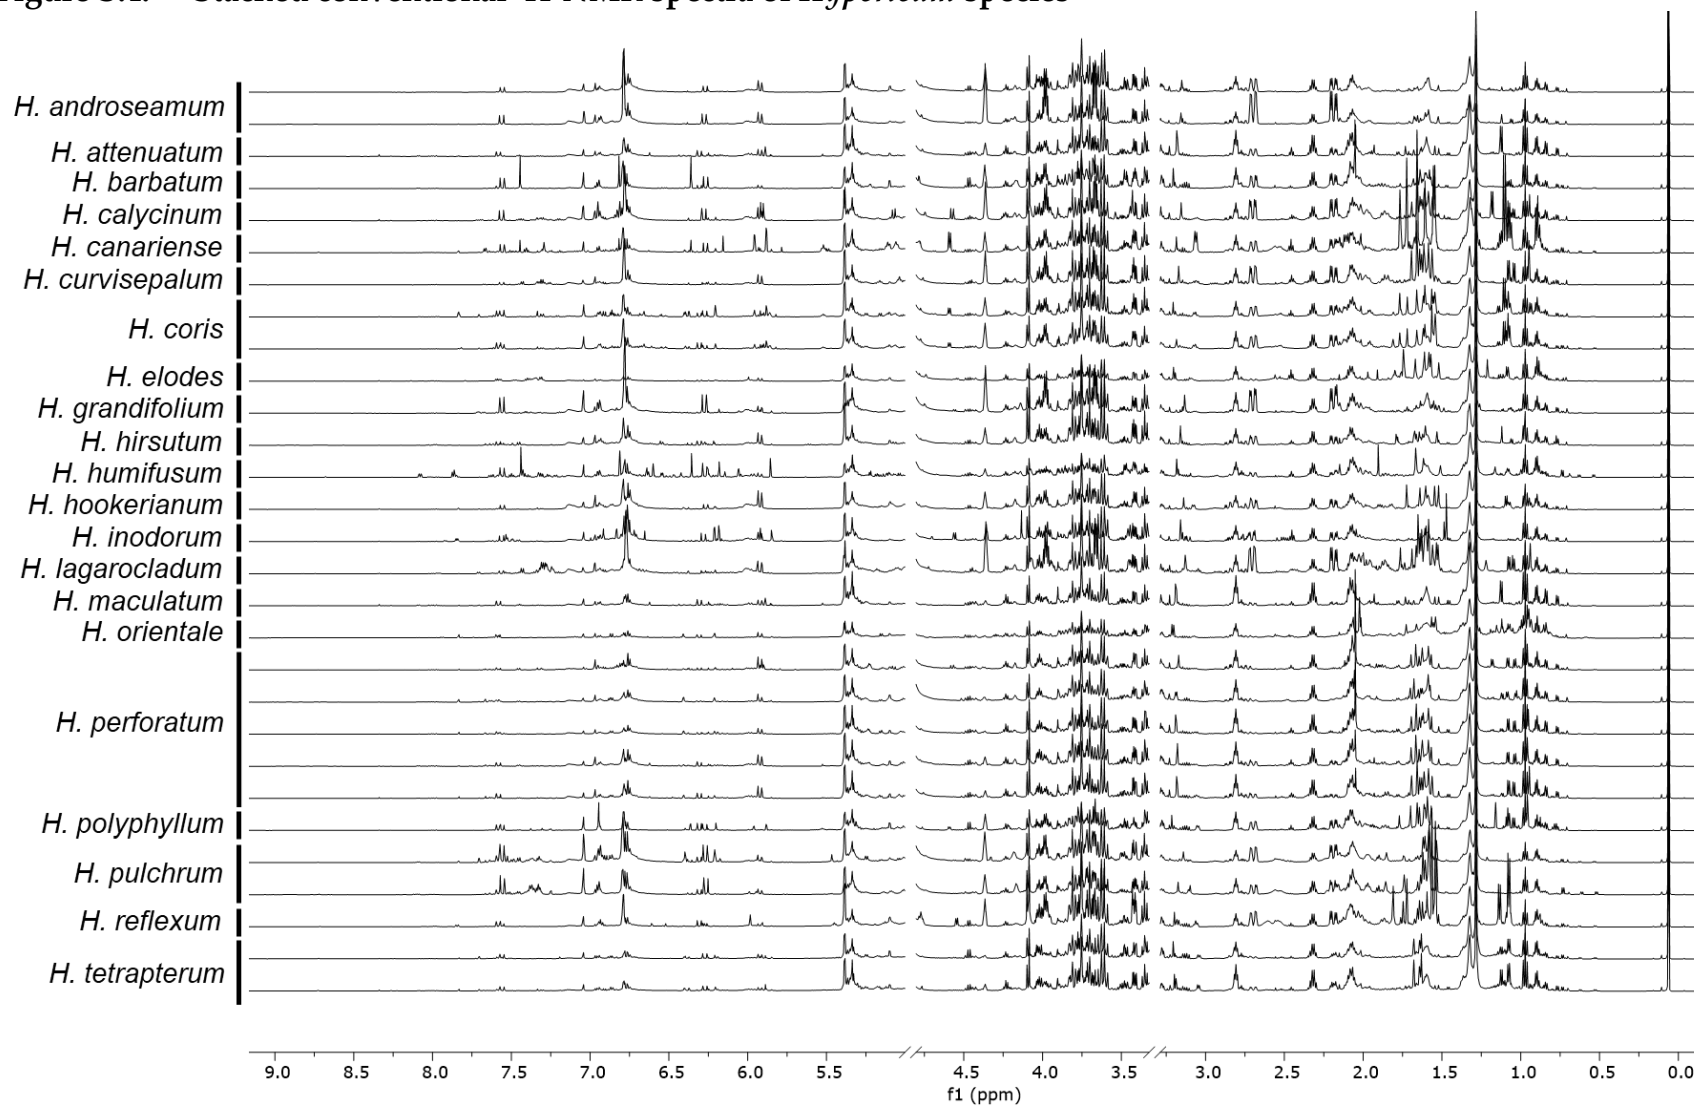

Stacked conventional  $^1\text{H}$ -NMR spectra of one biological replicate for each genotype.

Figure S.5: Stacked PSYCHE spectra of *Hypericum* species

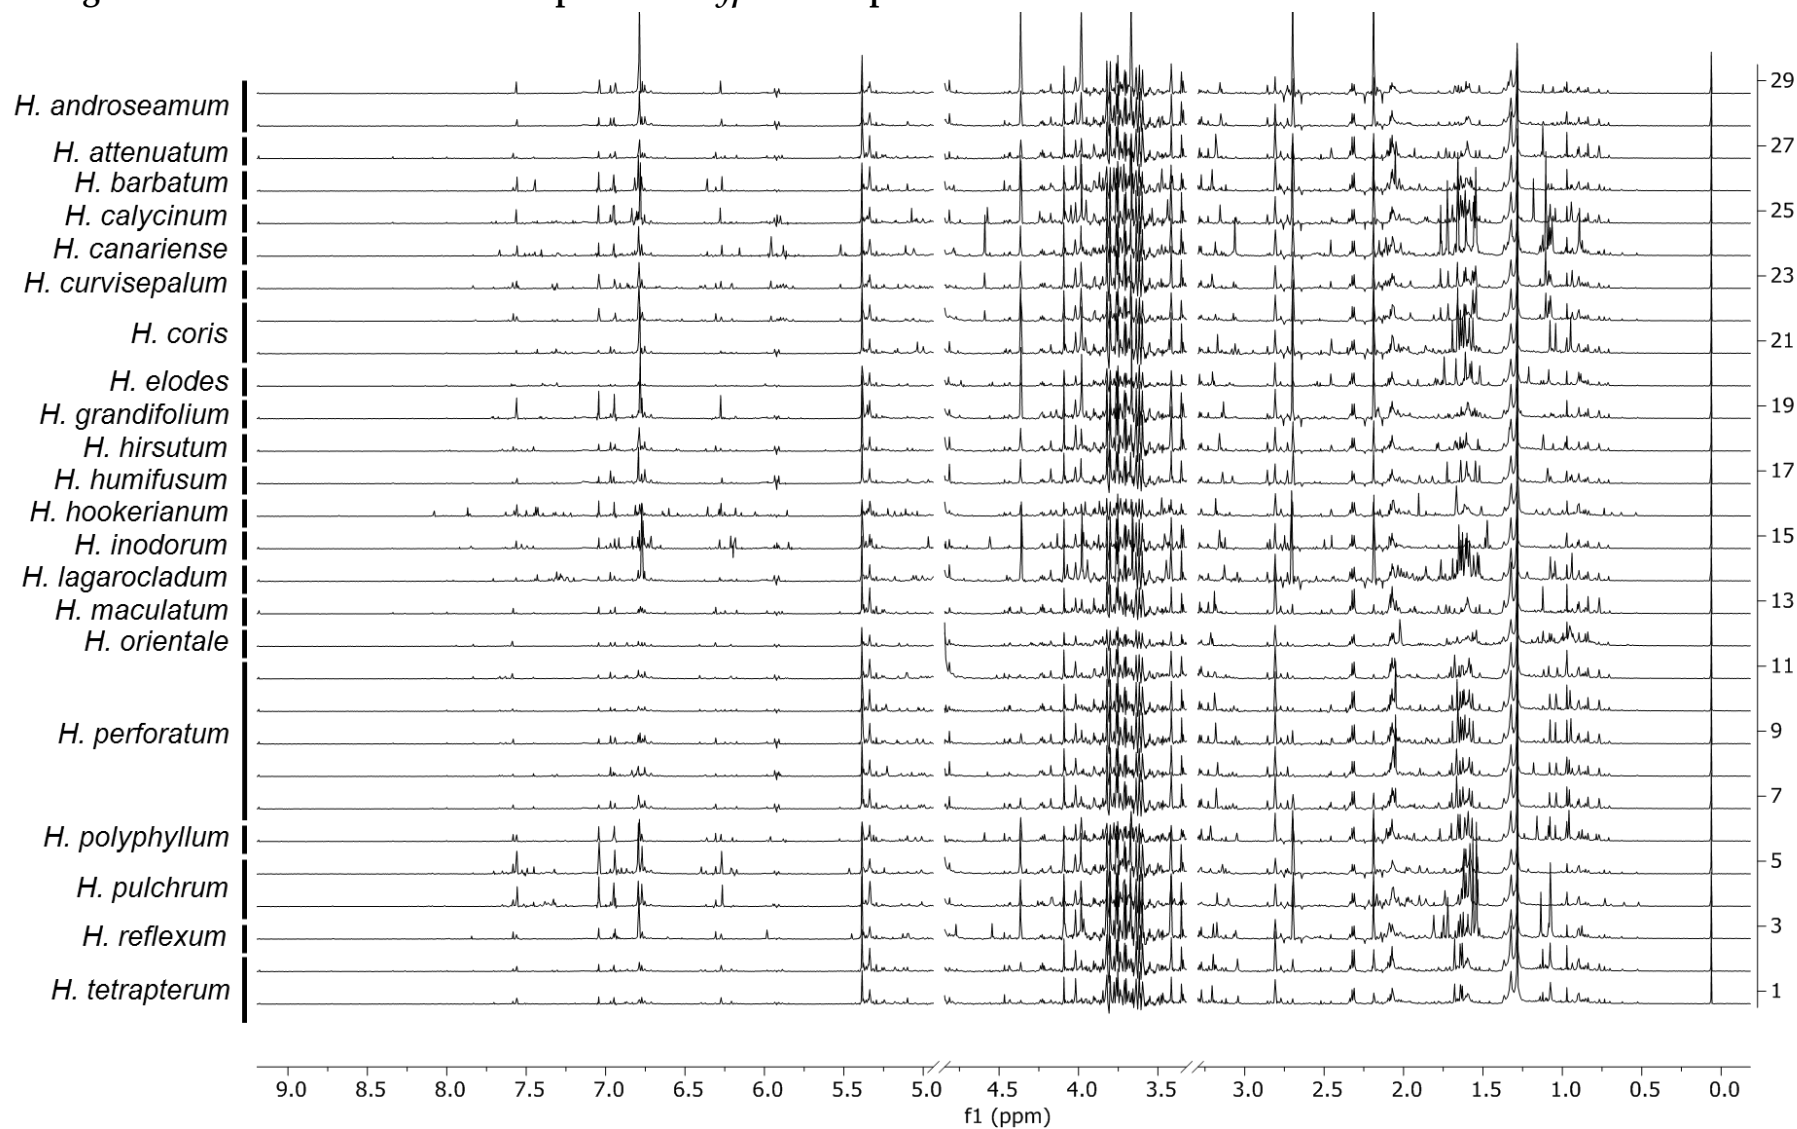

Stacked PSYCHE spectra of one biological replicate for each genotype.



**Figure S.6: PCA scores plots of selected experiments**

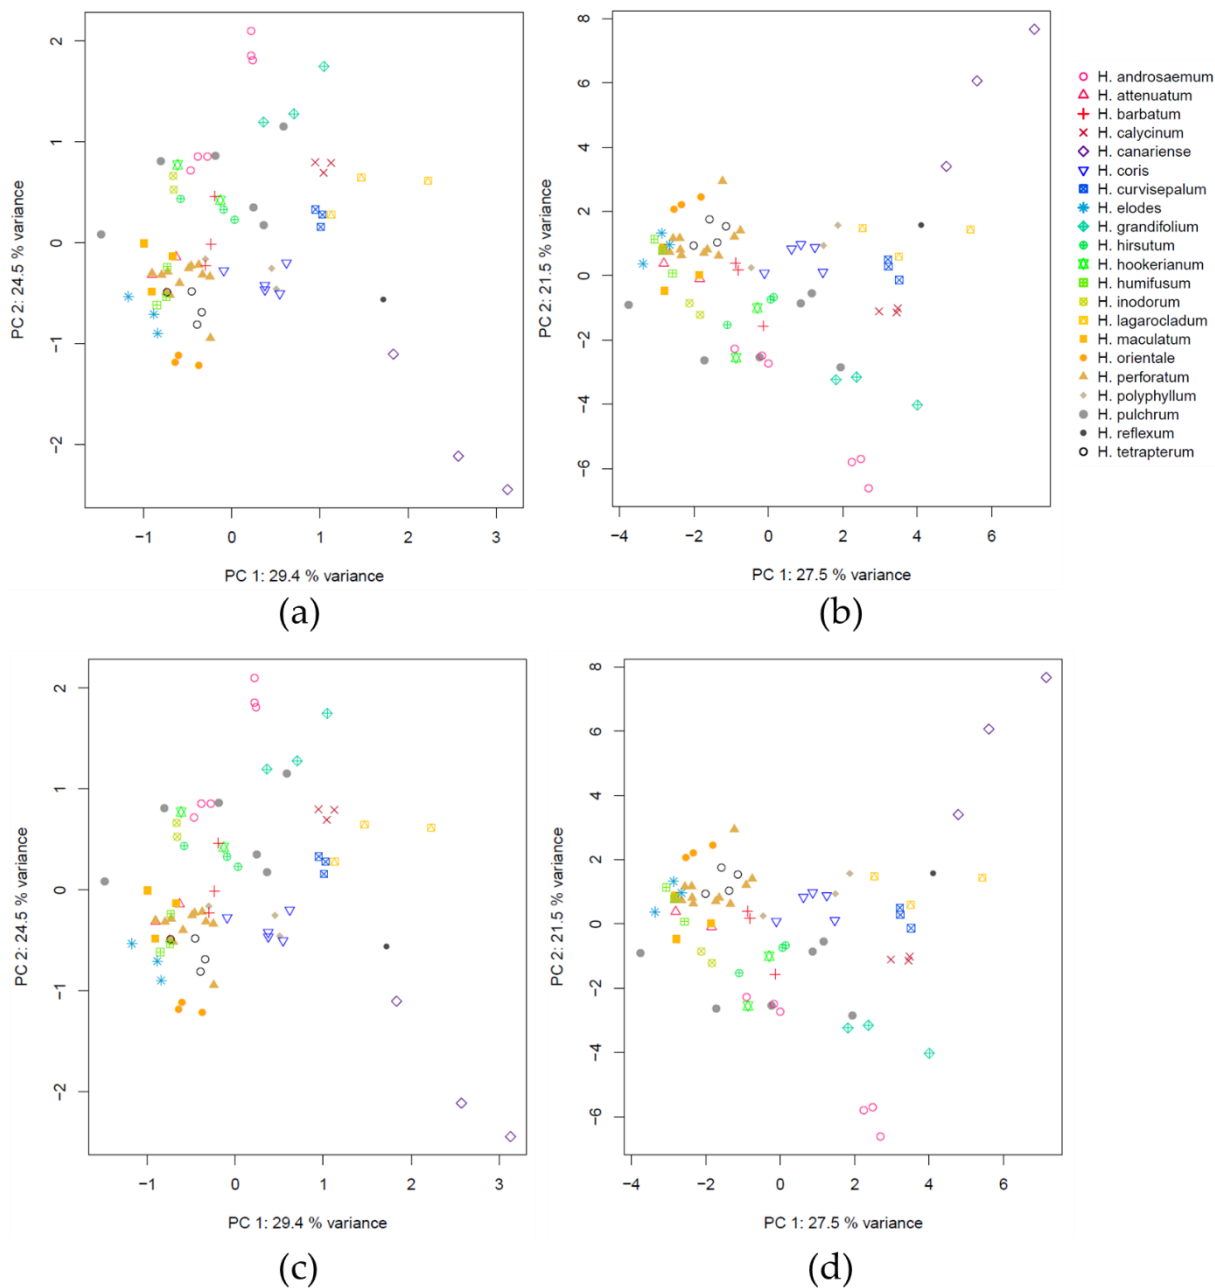

Scores plots of principal component analyses (PCAs) of *Hypericum* species based on (a) conventional  $^1\text{H-NMR}$  and (b) PSYCHE spectra. Scores plots of PCAs, based only on bins with signals higher than the limit of detection (three times standard deviation of noise) of (c) conventional  $^1\text{H-NMR}$  and (d) PSYCHE spectra.
